# Supplementary material for: Lifestyle-Related Exposure to Cadmium and Lead is Associated with Diabetic Kidney Disease
Source: PubMed Central journal article supplement (PMC7463543; doi:10.3390/jcm9082432), 2020-07-30
Supplement: jcm-09-02432-s001.pdf [file jcm-09-02432-s001.pdf]

## Supplementary Materials

**Table S1.** Elmer Nexion300× ICP–MS instrumentation.

| <b>Parameter</b>            | <b>Value/Setting</b>        |
|-----------------------------|-----------------------------|
| RF power                    | 1.25 kW                     |
| Plasma gas flow (Ar)        | 18 L min <sup>-1</sup>      |
| Auxiliary gas flow (Ar)     | 1.3 L min <sup>-1</sup>     |
| Nebulizer gas flow (Ar)     | ~0.91 L min <sup>-1</sup>   |
| Scan mode                   | Peak hopping                |
| Sweeps/reading              | 20                          |
| Readings/replicate          | 1                           |
| Replicates                  | 5                           |
| Dwell time(s)               | 50 ms For analytes (Cd, Pb) |
| Ion lens voltage(s)         | Autolens™                   |
| Detector mode               | Dual                        |
| Calibration Regression Type | Linear to zero              |
| Rinse time                  | 20 s                        |

**Table S2 - Overview of food items included in each food category.**

|                                       |                           |
|---------------------------------------|---------------------------|
| <b>Vegetables</b>                     | <b>Bread</b>              |
| Broccoli, cauliflower etc.            | Croissants                |
| Sal, spinach, endive etc.             | Other rolls               |
| Mushrooms                             | Slices of bread           |
| Onions, pepper                        | Rye bread                 |
| Raw vegetables                        | Raisin bread              |
| Legumes                               | <b>Fish</b>               |
| Split pea soup                        | Flounder, etc             |
| Split peas, beans etc.                | Unknown type of fish      |
| <b>Potatoes</b>                       | Baked fish                |
| Boiled/mashed potatoes without fat    | Herring                   |
| Fried/mashed potatoes with fat        | Salmon                    |
| Oven-grilled French fries             | Shellfish and crustaceans |
| Deep fried French fries               | Trout, etc                |
| French fries prepared by someone else | <b>Fruit</b>              |
| <b>Liver and kidney</b>               | Citrus fruit              |
| Cooked liver                          | Other fruit               |
| Liver spread                          | Fruit in can/jar          |
| Liver/kidney products                 | <b>Cacao</b>              |
| <b>Rice</b>                           | Chocolate Paste           |
| Rice                                  | Chocolate, bonbons        |

**Table S3.** Daily amounts of dietary intake.

| Dietary Intake                 | n=  | Total Population | Lowest Tertile | Middle Tertile | Highest Tertile |
|--------------------------------|-----|------------------|----------------|----------------|-----------------|
| Total caloric intake, kcal/day | 229 | 1850 ± 619       | 116 ± 261      | 1797 ± 146     | 2530 ± 449      |
| Vegetables, g/day              | 226 | 112 (63–63)      | 52 (29–68)     | 113 (101–129)  | 180 (164–209)   |
| Rice, g/day                    | 221 | 6 (0–16)         | 0 (0–0)        | 10 (5–10)      | 25 (20–35)      |
| Potatoes, g/day                | 226 | 119 (76–163)     | 50 (26–80)     | 119 (100–123)  | 190 (163–240)   |
| Bread, g/day                   | 226 | 108 (72–143)     | 66 (29–71)     | 108 (104–129)  | 171 (147–204)   |
| Fish, g/day                    | 226 | 17 (8–27)        | 2 (0–8)        | 17 (15–19)     | 34 (27–48)      |
| Fruit, g/day                   | 226 | 126 (81–235)     | 62 (33–83)     | 129 (116–196)  | 255 (241–348)   |
| Liver and kidney, g/day        | 226 | 0 (0–7)          | 0 (0–0)        | 3 (1–3)        | 10 (7–15)       |
| Cacao, g/day                   | 226 | 2 (0–6)          | 0 (0–0.5)      | 2 (1–3)        | 10 (6–15)       |

**Table S4.** Multivariate logistic regression between Cd and Pb and albumin/creatinine ratio.

| Independent Variables | Albumin/Creatinine Ratio |           |
|-----------------------|--------------------------|-----------|
|                       | OR                       | 95%CI     |
| Cadmium nmol/L        |                          |           |
| Model 1 (crude)       | 1.24                     | 0.96–1.59 |
| Model 2               | 1.38                     | 1.06–1.81 |
| Model 3               | 1.36                     | 1.03–1.79 |
| Model 4               | 1.36                     | 1.03–1.79 |
| Model 5               | 1.17                     | 0.87–1.57 |
| Model 6*              | 1.10                     | 0.81–1.50 |
| Lead µmol/L           |                          |           |
| Model 1 (crude)       | 2.46                     | 1.62–3.72 |
| Model 2               | 2.29                     | 1.50–3.49 |
| Model 3               | 2.24                     | 1.49–3.44 |
| Model 4               | 2.28                     | 1.46–3.58 |
| Model 5               | 2.07                     | 1.31–3.27 |
| Model 6               | 2.03                     | 1.29–3.22 |

Model 1 is unadjusted (crude), Model 2 is adjusted for age, gender, Model 3 is adjusted for model 2 and HbA1c, insulin use, years diabetes, mean arterial pressure, Model 4 is adjusted for model 3 and alcohol intake (g/day), Model 5 is adjusted for model 4 and pack years, Model 6 is adjusted for model 5 and \* Lead (for cadmium) and \*\* cadmium (for lead).

**Table S5.** Multivariate logistic regression on the association between Cd and Pb and albuminuria and reduced creatinine clearance.

| Independent Variables | Creatinine Clearance<br><60 ml/min/1.73 m <sup>2</sup> |           | Albuminuria<br>>30 mg/24 h |           |
|-----------------------|--------------------------------------------------------|-----------|----------------------------|-----------|
|                       | OR                                                     | 95%CI     | OR                         | 95%CI     |
| Cadmium nmol/L        |                                                        |           |                            |           |
| <u>Model 6</u>        |                                                        |           |                            |           |
| Cd                    | 1.50                                                   | 1.02–2.21 | 1.01                       | 0.75–1.36 |
| Pb                    | 1.83                                                   | 1.07–3.15 | 1.75                       | 1.11–2.74 |
| Age                   | 1.08                                                   | 1.03–1.13 | 1.04                       | 0.99–1.08 |
| Sex                   | 0.62                                                   | 0.27–1.46 | 0.42                       | 0.20–0.86 |
| Hba1c                 | 0.97                                                   | 0.92–1.01 | 1.00                       | 0.97–1.04 |
| Insulin use           | 0.62                                                   | 0.26–1.46 | 1.09                       | 0.52–2.29 |
| Years diabetes        | 0.99                                                   | 0.95–1.05 | 1.00                       | 0.96–1.04 |
| MAP                   | 0.96                                                   | 0.92–0.99 | 1.03                       | 1.00–1.06 |
| Alcohol intake        | 0.97                                                   | 0.93–1.00 | 1.00                       | 0.98–1.03 |
| Pack years            | 0.99                                                   | 0.97–1.01 | 1.02                       | 1.01–1.04 |
| Lead µmol/L           |                                                        |           |                            |           |
| <u>Model 6</u>        |                                                        |           |                            |           |
| Pb                    | 1.83                                                   | 1.07–3.15 | 1.75                       | 1.11–2.74 |
| Cd                    | 1.50                                                   | 1.02–2.21 | 1.01                       | 0.75–1.36 |
| Age                   | 1.08                                                   | 1.03–1.13 | 1.04                       | 0.99–1.08 |
| Sex                   | 0.62                                                   | 0.27–1.46 | 0.42                       | 0.20–0.86 |
| Hba1c                 | 0.97                                                   | 0.92–1.01 | 1.00                       | 0.97–1.04 |
| Insulin use           | 0.62                                                   | 0.26–1.46 | 1.09                       | 0.52–2.29 |
| Years diabetes        | 0.99                                                   | 0.95–1.05 | 1.00                       | 0.96–1.04 |
| MAP                   | 0.96                                                   | 0.92–0.99 | 1.03                       | 1.00–1.06 |
| Alcohol intake        | 0.97                                                   | 0.93–1.00 | 1.00                       | 0.98–1.03 |
| Pack years            | 0.99                                                   | 0.97–1.01 | 1.02                       | 1.01–1.04 |
